# Supplementary material
Source: MDPI journal article supplement (https://www.mdpi.com/1999-4907/14/8/1691)
Supplement: s1 [file s1]

Archive with 5 entries (5 files):
- supplemental figure.pdf
- Table S1. Primer sequence of 10 SaAREB .xlsx
- Table S2. The information of  the cis-reactive elements.xlsx
- Table S3.Collinearity analysis among species.xlsx
- Table S4.Collinearity analysis within species.xlsx
