# Supplementary material
Source: MDPI journal article supplement (https://www.mdpi.com/1999-4907/14/8/1691)
Supplement: s1 [file s1 › supplemental figure.pdf]

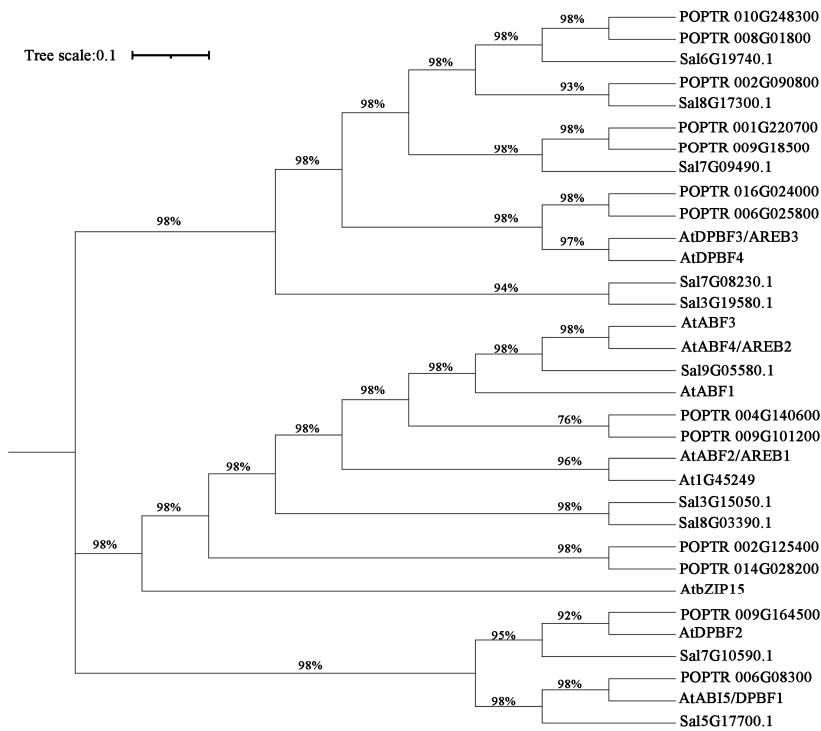

**Figure S1:** Phylogenetic relationships of AREB/ABF/ABI5 proteins in *A. thaliana*, *P. trichocarpa* and *S. album* which established by Maximum likelihood method.

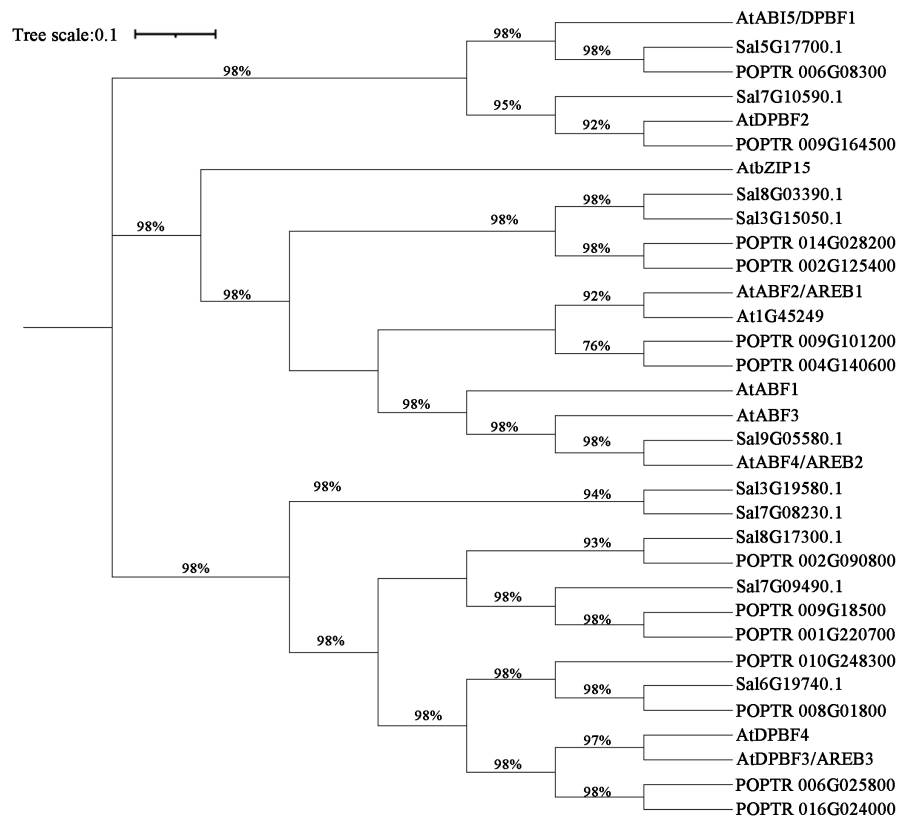

**Figure S2:** Phylogenetic relationships of AREB/ABF/ABI5 proteins in *A. thaliana*, *P. trichocarpa* and *S. album* which established by Maximum parsimony method.
