# Supplementary material
Source: MDPI journal article supplement (https://www.mdpi.com/1999-4907/14/8/1691)
Supplement: s1 [file s1 › Table S1. Primer sequence of 10 SaAREB .xlsx]

## Sheet: Sheet1
Table S1. qRT-PCR primer sequence of 10 SaAREB
Gene Name	Gene symbol	Forward Primer	Reverse Primer
Sal7G10590.1	SaAREB1	TTAGGTGGTGCGAAGGGTAG	ACTGTTTCCTAGCCCGAGAC
Sal6G19740.1	SaAREB2	AGCTTTGGGAGGTCAGTCTC	CCGTTCTTGGGACCTCATCT
Sal7G09490.1	SaAREB3	TGGGCTCCATGAACCTTGAT	CAATGATAAGCTCGCCTGCC
Sal8G17300.1	SaAREB4	CCCCTCAACGCCATGAATTT	TCCACGGTTTTGTTGCTCAG
Sal7G08230.1	SaAREB5	TTTTAAGTCGCCCGTCTCCT	CACCATCTCCTTCCACACCT
Sal3G15050.1	SaAREB6	TCAACATTACAAGGTGGCGC	TGTATGGAACCGGTGACACA
Sal9G05580.1	SaAREB7	CCACGAACGCTGAGTCAAAA	CCCTAGCCAAGAACTCCTCC
Sal8G03390.1	SaAREB8	AATCTCCCATTGACGAGGCA	CGCTCCAGATGTTCTTCAGC
Sal3G19580.1	SaAREB9	CACCCGCTGAAACTATGAGC	CATTTCCGAACCCCATCACC
Sal5G17700.1	SaAREB10	GGAATGGAGATGGGAGGAGG	TTTCCTTGCCCTAGACCTGG
