# Supplementary material
Source: MDPI journal article supplement (https://www.mdpi.com/1999-4907/14/8/1691)
Supplement: s1 [file s1 › Table S2. The information of the cis-reactive elements.xlsx]

## Sheet: Sheet1
Table S2. The information of the cis-reactive elements in SaCYP736A167
Gene name	Name	Cis-reactive elements	sequence motif	species	function
Sal1G21730.1	SaCYP736A167	G-box	TACGTG	Arabidopsis thaliana	cis-acting regulatory element involved in light responsiveness
Sal1G21730.1	SaCYP736A167	G-box	ACACGTGT	Brassica napus	cis-acting regulatory element involved in light responsiveness
Sal1G21730.1	SaCYP736A167	G-box	CACGTG	Arabidopsis thaliana	cis-acting regulatory element involved in light responsiveness
Sal1G21730.1	SaCYP736A167	G-box	CACGTG	Arabidopsis thaliana	cis-acting regulatory element involved in light responsiveness
Sal1G21730.1	SaCYP736A167	G-box	TACGTG	Arabidopsis thaliana	cis-acting regulatory element involved in light responsiveness
Sal1G21730.1	SaCYP736A167	CAT-box	GCCACT	Arabidopsis thaliana	cis-acting regulatory element related to meristem expression
Sal1G21730.1	SaCYP736A167	MYC	CATTTG	Arabidopsis thaliana
Sal1G21730.1	SaCYP736A167	AAGAA-motif	GAAAGAA	Avena sativa
Sal1G21730.1	SaCYP736A167	ABRE4	CACGTA	Zea mays
Sal1G21730.1	SaCYP736A167	ABRE4	CACGTA	Zea mays
Sal1G21730.1	SaCYP736A167	TATA-box	TATA	Arabidopsis thaliana	core promoter element around -30 of transcription start
Sal1G21730.1	SaCYP736A167	TATA-box	TATA	Arabidopsis thaliana	core promoter element around -30 of transcription start
Sal1G21730.1	SaCYP736A167	TATA-box	TATA	Arabidopsis thaliana	core promoter element around -30 of transcription start
Sal1G21730.1	SaCYP736A167	TATA-box	ATTATA	Brassica napus	core promoter element around -30 of transcription start
Sal1G21730.1	SaCYP736A167	TATA-box	TATAA	Arabidopsis thaliana	core promoter element around -30 of transcription start
Sal1G21730.1	SaCYP736A167	TATA-box	TATA	Arabidopsis thaliana	core promoter element around -30 of transcription start
Sal1G21730.1	SaCYP736A167	TATA-box	TATTTAAA	Arabidopsis thaliana	core promoter element around -30 of transcription start
Sal1G21730.1	SaCYP736A167	TATA-box	ATTATA	Brassica napus	core promoter element around -30 of transcription start
Sal1G21730.1	SaCYP736A167	TATA-box	TATAA	Arabidopsis thaliana	core promoter element around -30 of transcription start
Sal1G21730.1	SaCYP736A167	TATA-box	TATA	Arabidopsis thaliana	core promoter element around -30 of transcription start
Sal1G21730.1	SaCYP736A167	TATA-box	TATAAAT	Brassica juncea	core promoter element around -30 of transcription start
Sal1G21730.1	SaCYP736A167	TATA-box	TATAAA	Helianthus annuus	core promoter element around -30 of transcription start
Sal1G21730.1	SaCYP736A167	TATA-box	TATAA	Arabidopsis thaliana	core promoter element around -30 of transcription start
Sal1G21730.1	SaCYP736A167	TATA-box	TATA	Arabidopsis thaliana	core promoter element around -30 of transcription start
Sal1G21730.1	SaCYP736A167	TATA-box	TATAAAA	Pisum sativum	core promoter element around -30 of transcription start
Sal1G21730.1	SaCYP736A167	TATA-box	TATAAA	Helianthus annuus	core promoter element around -30 of transcription start
Sal1G21730.1	SaCYP736A167	TATA-box	TATATAA	Arabidopsis thaliana	core promoter element around -30 of transcription start
Sal1G21730.1	SaCYP736A167	TATA-box	TATATA	Arabidopsis thaliana	core promoter element around -30 of transcription start
Sal1G21730.1	SaCYP736A167	TATA-box	TATA	Arabidopsis thaliana	core promoter element around -30 of transcription start
Sal1G21730.1	SaCYP736A167	TATA-box	ATATAA	Brassica oleracea	core promoter element around -30 of transcription start
Sal1G21730.1	SaCYP736A167	TATA-box	TATA	Arabidopsis thaliana	core promoter element around -30 of transcription start
Sal1G21730.1	SaCYP736A167	TATA-box	TATACA	Helianthus annuus	core promoter element around -30 of transcription start
Sal1G21730.1	SaCYP736A167	TATA-box	TATA	Arabidopsis thaliana	core promoter element around -30 of transcription start
Sal1G21730.1	SaCYP736A167	TATA-box	TATAA	Arabidopsis thaliana	core promoter element around -30 of transcription start
Sal1G21730.1	SaCYP736A167	TATA-box	TATA	Arabidopsis thaliana	core promoter element around -30 of transcription start
Sal1G21730.1	SaCYP736A167	TATA-box	TATATA	Arabidopsis thaliana	core promoter element around -30 of transcription start
Sal1G21730.1	SaCYP736A167	TATA-box	ATATAT	Brassica napus	core promoter element around -30 of transcription start
Sal1G21730.1	SaCYP736A167	TATA-box	TATA	Arabidopsis thaliana	core promoter element around -30 of transcription start
Sal1G21730.1	SaCYP736A167	TATA-box	TATAA	Arabidopsis thaliana	core promoter element around -30 of transcription start
Sal1G21730.1	SaCYP736A167	TATA-box	TATA	Arabidopsis thaliana	core promoter element around -30 of transcription start
Sal1G21730.1	SaCYP736A167	TATA-box	TATA	Arabidopsis thaliana	core promoter element around -30 of transcription start
Sal1G21730.1	SaCYP736A167	GATA-motif	GATAGGA	Arabidopsis thaliana	part of a light responsive element
Sal1G21730.1	SaCYP736A167	TC-rich repeats	ATTCTCTAAC	Nicotiana tabacum	cis-acting element involved in defense and stress responsiveness
Sal1G21730.1	SaCYP736A167	Myb-binding site	CAACAG	Nicotiana tabacum
Sal1G21730.1	SaCYP736A167	Myb-binding site	CAACAG	Nicotiana tabacum
Sal1G21730.1	SaCYP736A167	TCT-motif	TCTTAC	Arabidopsis thaliana	part of a light responsive element
Sal1G21730.1	SaCYP736A167	ABRE	ACGTG	Arabidopsis thaliana	cis-acting element involved in the abscisic acid responsiveness
Sal1G21730.1	SaCYP736A167	ABRE	ACGTG	Arabidopsis thaliana	cis-acting element involved in the abscisic acid responsiveness
Sal1G21730.1	SaCYP736A167	ABRE	CACGTG	Arabidopsis thaliana	cis-acting element involved in the abscisic acid responsiveness
Sal1G21730.1	SaCYP736A167	ABRE	ACGTG	Arabidopsis thaliana	cis-acting element involved in the abscisic acid responsiveness
Sal1G21730.1	SaCYP736A167	ABRE	CACGTG	Arabidopsis thaliana	cis-acting element involved in the abscisic acid responsiveness
Sal1G21730.1	SaCYP736A167	ABRE	ACGTG	Arabidopsis thaliana	cis-acting element involved in the abscisic acid responsiveness
Sal1G21730.1	SaCYP736A167	ABRE	ACGTG	Arabidopsis thaliana	cis-acting element involved in the abscisic acid responsiveness
Sal1G21730.1	SaCYP736A167	ABRE	ACGTG	Arabidopsis thaliana	cis-acting element involved in the abscisic acid responsiveness
Sal1G21730.1	SaCYP736A167	ABRE3a	TACGTG	Zea mays
Sal1G21730.1	SaCYP736A167	ABRE3a	TACGTG	Zea mays
Sal1G21730.1	SaCYP736A167	LTR	CCGAAA	Hordeum vulgare	cis-acting element involved in low-temperature responsiveness
Sal1G21730.1	SaCYP736A167	ATC-motif	AGTAATCT	Spinacia oleracea	part of a conserved DNA module involved in light responsiveness
Sal1G21730.1	SaCYP736A167	ERE	ATTTTAAA	Nicotiana glutinos
Sal1G21730.1	SaCYP736A167	ERE	ATTTTAAA	Nicotiana glutinos
Sal1G21730.1	SaCYP736A167	ERE	ATTTCATA	Nicotiana glutinos
Sal1G21730.1	SaCYP736A167	ERE	ATTTTAAA	Nicotiana glutinos
Sal1G21730.1	SaCYP736A167	Myc	TCTCTTA	Arabidopsis thaliana
Sal1G21730.1	SaCYP736A167	Myb	TAACTG	Arabidopsis thaliana
Sal1G21730.1	SaCYP736A167	TCCC-motif	TCTCCCT	Spinacia oleracea	part of a light responsive element
Sal1G21730.1	SaCYP736A167	Box 4	ATTAAT	Petroselinum crispum	part of a conserved DNA module involved in light responsiveness
Sal1G21730.1	SaCYP736A167	Box 4	ATTAAT	Petroselinum crispum	part of a conserved DNA module involved in light responsiveness
Sal1G21730.1	SaCYP736A167	W box	TTGACC	Arabidopsis thaliana
Sal1G21730.1	SaCYP736A167	ARE	AAACCA	Zea mays	cis-acting regulatory element essential for the anaerobic induction
Sal1G21730.1	SaCYP736A167	MYB	CAACAG	Arabidopsis thaliana
Sal1G21730.1	SaCYP736A167	MYB	CAACAG	Arabidopsis thaliana
Sal1G21730.1	SaCYP736A167		motif_sequence	organism	short_function
Sal1G21730.1	SaCYP736A167		motif_sequence	organism	short_function
Sal1G21730.1	SaCYP736A167		motif_sequence	organism	short_function
Sal1G21730.1	SaCYP736A167		motif_sequence	organism	short_function
Sal1G21730.1	SaCYP736A167		motif_sequence	organism	short_function
Sal1G21730.1	SaCYP736A167		motif_sequence	organism	short_function
Sal1G21730.1	SaCYP736A167		motif_sequence	organism	short_function
Sal1G21730.1	SaCYP736A167		motif_sequence	organism	short_function
Sal1G21730.1	SaCYP736A167		motif_sequence	organism	short_function
Sal1G21730.1	SaCYP736A167		motif_sequence	organism	short_function
Sal1G21730.1	SaCYP736A167	re2f-1	GCGGGAAA	Oryza sativa
Sal1G21730.1	SaCYP736A167	WUN-motif	AAATTTCTT	Nicotiana glutinosa
Sal1G21730.1	SaCYP736A167	CAAT-box	CCAAT	Arabidopsis thaliana	common cis-acting element in promoter and enhancer regions
Sal1G21730.1	SaCYP736A167	CAAT-box	CAAT	Nicotiana glutinosa
Sal1G21730.1	SaCYP736A167	CAAT-box	CCAAT	Arabidopsis thaliana	common cis-acting element in promoter and enhancer regions
Sal1G21730.1	SaCYP736A167	CAAT-box	CAAAT	Pisum sativum	common cis-acting element in promoter and enhancer regions
Sal1G21730.1	SaCYP736A167	CAAT-box	CAAAT	Pisum sativum	common cis-acting element in promoter and enhancer regions
Sal1G21730.1	SaCYP736A167	CAAT-box	CAAT	Nicotiana glutinosa
Sal1G21730.1	SaCYP736A167	CAAT-box	CAAT	Nicotiana glutinosa
Sal1G21730.1	SaCYP736A167	CAAT-box	CCAAT	Arabidopsis thaliana	common cis-acting element in promoter and enhancer regions
Sal1G21730.1	SaCYP736A167	CAAT-box	CAAAT	Pisum sativum	common cis-acting element in promoter and enhancer regions
Sal1G21730.1	SaCYP736A167	CAAT-box	CAAAT	Pisum sativum	common cis-acting element in promoter and enhancer regions
Sal1G21730.1	SaCYP736A167	CAAT-box	CAAT	Nicotiana glutinosa
Sal1G21730.1	SaCYP736A167	CAAT-box	CCAAT	Arabidopsis thaliana	common cis-acting element in promoter and enhancer regions
Sal1G21730.1	SaCYP736A167	CAAT-box	CAAT	Nicotiana glutinosa
Sal1G21730.1	SaCYP736A167	CAAT-box	CCAAT	Arabidopsis thaliana	common cis-acting element in promoter and enhancer regions
Sal1G21730.1	SaCYP736A167	CAAT-box	CAAT	Nicotiana glutinosa
Sal1G21730.1	SaCYP736A167	CAAT-box	CAAT	Nicotiana glutinosa
Sal1G21730.1	SaCYP736A167	CAAT-box	CAAAT	Pisum sativum	common cis-acting element in promoter and enhancer regions
Sal1G21730.1	SaCYP736A167	CAAT-box	CAAT	Nicotiana glutinosa
Sal1G21730.1	SaCYP736A167	CAAT-box	CAAT	Nicotiana glutinosa
Sal1G21730.1	SaCYP736A167	CAAT-box	CAAAT	Pisum sativum	common cis-acting element in promoter and enhancer regions
Sal1G21730.1	SaCYP736A167	CAAT-box	CAAT	Nicotiana glutinosa
Sal1G21730.1	SaCYP736A167	CAAT-box	CAAT	Nicotiana glutinosa
Sal1G21730.1	SaCYP736A167	CAAT-box	CAAT	Nicotiana glutinosa
Sal1G21730.1	SaCYP736A167	CAAT-box	CAAAT	Pisum sativum	common cis-acting element in promoter and enhancer regions
Sal1G21730.1	SaCYP736A167	CAAT-box	CAAT	Nicotiana glutinosa
Sal1G21730.1	SaCYP736A167	CAAT-box	CAAAT	Pisum sativum	common cis-acting element in promoter and enhancer regions
Sal1G21730.1	SaCYP736A167	CAAT-box	CAAAT	Pisum sativum	common cis-acting element in promoter and enhancer regions
Sal1G21730.1	SaCYP736A167	CAAT-box	CAAT	Nicotiana glutinosa
Sal1G21730.1	SaCYP736A167	CAAT-box	CAAT	Nicotiana glutinosa
Sal1G21730.1	SaCYP736A167	CAAT-box	CCAAT	Arabidopsis thaliana	common cis-acting element in promoter and enhancer regions
Sal1G21730.1	SaCYP736A167	CAAT-box	CAAT	Nicotiana glutinosa
Sal1G21730.1	SaCYP736A167	CAAT-box	CAAT	Nicotiana glutinosa
Sal1G21730.1	SaCYP736A167	CAAT-box	CAAAT	Pisum sativum	common cis-acting element in promoter and enhancer regions
Sal1G21730.1	SaCYP736A167	CAAT-box	CAAT	Nicotiana glutinosa
Sal1G21730.1	SaCYP736A167	CAAT-box	TGCCAAC	Petunia hybrida	common cis-acting element in promoter and enhancer regions
Sal1G21730.1	SaCYP736A167	CAAT-box	CAAAT	Pisum sativum	common cis-acting element in promoter and enhancer regions
Sal1G21730.1	SaCYP736A167	CAAT-box	CAAT	Nicotiana glutinosa
Sal1G21730.1	SaCYP736A167	CAAT-box	CAAT	Nicotiana glutinosa
Sal1G21730.1	SaCYP736A167	CAAT-box	CAAAT	Pisum sativum	common cis-acting element in promoter and enhancer regions
Sal1G21730.1	SaCYP736A167	CAAT-box	CCAAT	Arabidopsis thaliana	common cis-acting element in promoter and enhancer regions
Sal1G21730.1	SaCYP736A167	CAAT-box	CAAT	Nicotiana glutinosa
Sal1G21730.1	SaCYP736A167	CAAT-box	CAAT	Nicotiana glutinosa
Sal1G21730.1	SaCYP736A167	G-Box	CACGTT	Pisum sativum	cis-acting regulatory element involved in light responsiveness
Sal1G21730.1	SaCYP736A167	G-Box	CACGTG	Pisum sativum	cis-acting regulatory element involved in light responsiveness
Sal1G21730.1	SaCYP736A167	G-Box	CACGTG	Pisum sativum	cis-acting regulatory element involved in light responsiveness
Sal1G21730.1	SaCYP736A167	G-Box	CACGTT	Pisum sativum	cis-acting regulatory element involved in light responsiveness
Sal1G21730.1	SaCYP736A167	AT~TATA-box	TATATAAA	Arabidopsis thaliana
Sal1G21730.1	SaCYP736A167	AT~TATA-box	TATATA	Arabidopsis thaliana
Sal1G21730.1	SaCYP736A167	AT~TATA-box	TATATA	Arabidopsis thaliana
Sal1G21730.1	SaCYP736A167	AP-1	TGAGTTAG	Arabidopsis thaliana
Sal1G21730.1	SaCYP736A167	ACE	GCGACGTACC	Petroselinum crispum	cis-acting element involved in light responsiveness
Sal1G21730.1	SaCYP736A167	STRE	AGGGG	Arabidopsis thaliana
Sal1G21730.1	SaCYP736A167	STRE	AGGGG	Arabidopsis thaliana
Sal1G21730.1	SaCYP736A167	STRE	AGGGG	Arabidopsis thaliana
Sal1G21730.1	SaCYP736A167	STRE	AGGGG	Arabidopsis thaliana
Sal1G21730.1	SaCYP736A167	STRE	AGGGG	Arabidopsis thaliana
Sal1G21730.1	SaCYP736A167	STRE	AGGGG	Arabidopsis thaliana
Sal1G21730.1	SaCYP736A167	STRE	AGGGG	Arabidopsis thaliana
Sal1G21730.1	SaCYP736A167	Box III	atCATTTTCACt	Pisum sativum	protein binding site
Sal1G21730.1	SaCYP736A167	DRE core	GCCGAC	Arabidopsis thaliana
