# Supplementary material
Source: MDPI journal article supplement (https://www.mdpi.com/1999-4907/14/8/1691)
Supplement: s1 [file s1 › Table S3.Collinearity analysis among species.xlsx]

## Sheet: Sheet1
Table S3. The collinearity analysis among sandalwood
Name	S album.	Populus trichocarpa		Name	S album.	Arabidopsis thaliana
SaAREB1	Sal7G10590.1	Potri.009G164500.4		SaAREB1	Sal7G10590.1	AT3G44460.1
SaAREB2	Sal6G19740.1	Potri.008G010800.1		SaAREB6	Sal3G15050.1	AT1G49720.2
SaAREB2	Sal6G19740.1	Potri.010G248100.1		SaAREB6	Sal3G15050.1	AT3G19290.3
SaAREB3	Sal7G09490.1	Potri.001G220700.2		SaAREB6	Sal3G15050.1	AT5G42910.1
SaAREB4	Sal8G17300.1	Potri.002G090800.1		SaAREB7	Sal9G05580.1	AT1G49720.2
SaAREB6	Sal3G15050.1	Potri.002G125400.1		SaAREB7	Sal9G05580.1	AT3G19290.3
SaAREB6	Sal3G15050.1	Potri.009G101166.1		SaAREB7	Sal9G05580.1	AT4G34000.2
SaAREB6	Sal3G15050.1	Potri.014G028200.2		SaAREB8	Sal8G03390.1	AT1G45249.6
SaAREB7	Sal9G05580.1	Potri.002G125400.1		SaAREB8	Sal8G03390.1	AT4G34000.2
SaAREB7	Sal9G05580.1	Potri.004G140600.2		SaAREB8	Sal8G03390.1	AT5G42910.1
SaAREB7	Sal9G05580.1	Potri.009G101166.1		SaAREB10	Sal5G17700.1	AT2G36270.3
SaAREB7	Sal9G05580.1	Potri.014G028200.2		SaAREB10	Sal5G17700.1	AT3G44460.1
SaAREB8	Sal8G03390.1	Potri.002G125400.1
SaAREB8	Sal8G03390.1	Potri.009G101166.1
SaAREB8	Sal8G03390.1	Potri.014G028200.2
SaAREB9	Sal3G19580.1	Potri.002G067400.1
SaAREB9	Sal3G19580.1	Potri.005G192900.1
