# Supplementary material
Source: MDPI journal article supplement (https://www.mdpi.com/1999-4907/14/8/1691)
Supplement: s1 [file s1 › Table S4.Collinearity analysis within species.xlsx]

## Sheet: Sheet1
Table S4. Collinearity analysis between S. album, A. thaliana, P. trichocarpa
Number	Gene Name	Location	Start	End
1	SaAREB6(Sal3G15050.1)	chr3	13333069	13339388
	SaAREB8(Sal8G03390.1)	chr8	2780305	2784966
2	SaAREB10(Sal5G17700.1)	chr5	13700879	13705506
	SaAREB1(Sal7G10590.1)	chr7	8471287	8476464
